# Supplementary material for: Astragaloside IV as a Memory-Enhancing Agent: In Silico Studies with In Vivo Analysis and Post Mortem ADME-Tox Profiling in Mice
Source: MDPI journal article supplement (doi:10.3390/ijms25074021), 2024-04-04
Supplement: s1 [file s1]

Table S1. Risk assessment of adverse side effects by OSIRIS Property Explorer of the tested astragalosides.

| Name  | mutagenic                                                                         | tumorigenic                                                                       | irritant                                                                          | reproductive effective                                                            |
|-------|-----------------------------------------------------------------------------------|-----------------------------------------------------------------------------------|-----------------------------------------------------------------------------------|-----------------------------------------------------------------------------------|
| A I   |  |  |  |  |
| A II  |  |  |  |  |
| A III |  |  |  |  |
| A IV  |  |  |  |  |

 no risk
